# Supplementary material for: From rapid visual survey to multi-hazard risk prioritisation and numerical fragility of school buildings in Banda Aceh, Indonesia
Source: Copernicus journal article supplement (doi:10.5194/nhess-2018-397), 2019-01-15
Supplement: Supplementary file [file nhess-2018-397-AC1-supplement.pdf]

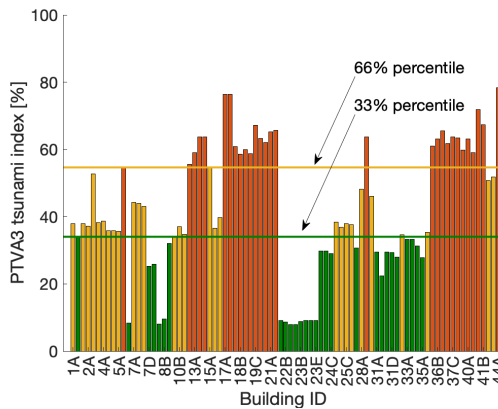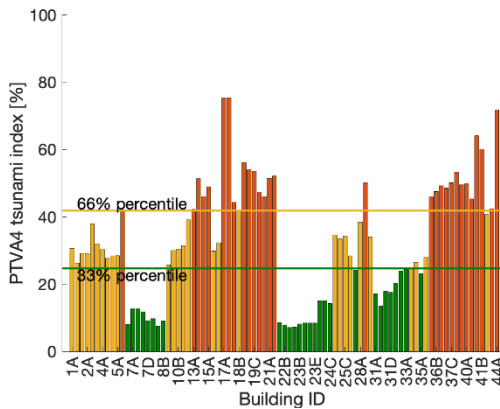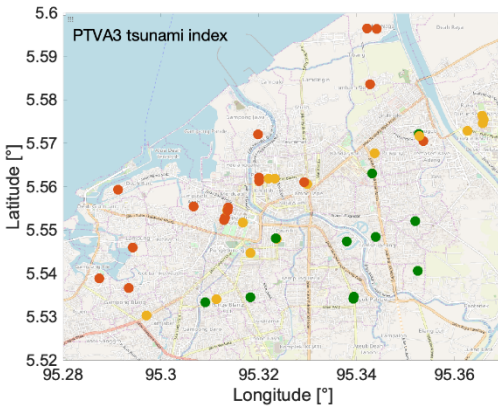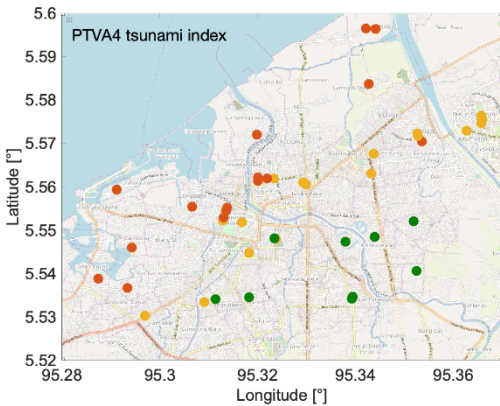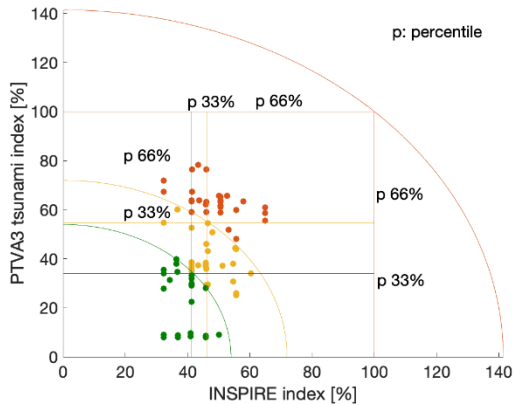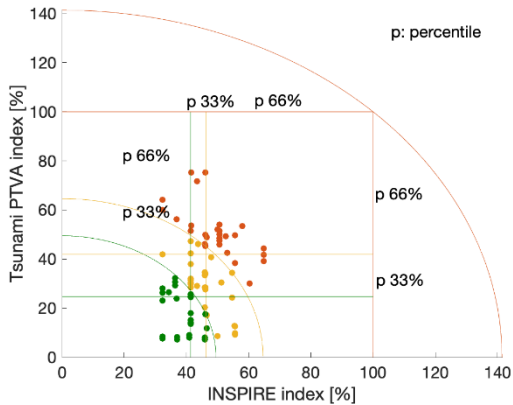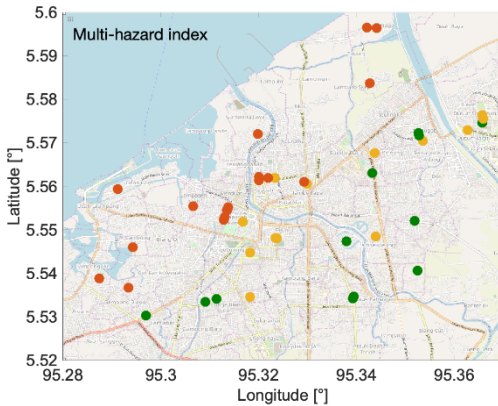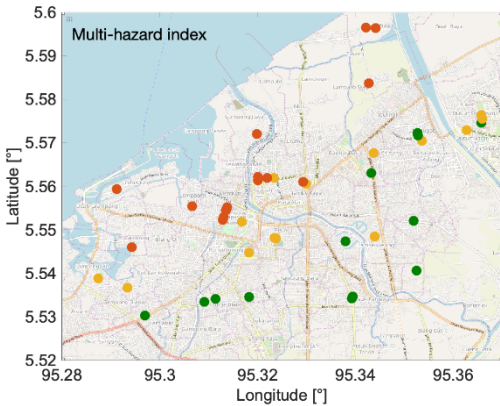

Fig. 1: comparison of the prioritisation based on the PTVA3 and PTVA4 indices.
